# Supplementary material for: Prognostic Scores and Azole-Resistant Aspergillus fumigatus in Invasive Aspergillosis from an Indian Respiratory Medicine ICU (ICU Patients with IA Suspicion)
Source: MDPI journal article supplement (doi:10.3390/jof7110991), 2021-11-20
Supplement: s1 [file s1]

**Table S1.** Sample and culture distribution.

| Sample              | Total patients/<br>samples | Direct<br>microscopy<br>positive | Culture positive                                                                                                                                                     | Repeat isolation                                                      |
|---------------------|----------------------------|----------------------------------|----------------------------------------------------------------------------------------------------------------------------------------------------------------------|-----------------------------------------------------------------------|
| Blood               | 235/ 449                   | Not<br>applicable                | 1 ( <i>A.nidulans</i> )                                                                                                                                              | 1 ( <i>A.nidulans</i> )                                               |
| Sputum              | 188/ 197                   | 21                               | 20 (12 <i>A. flavus</i> , 8 <i>A.fumigatus</i> )                                                                                                                     | 6 (4 <i>A.flavus</i> , 2<br><i>A.fumigatus</i> )                      |
| BAL                 | 24/ 41                     | 7                                | 7 (1 <i>A.flavus</i> , 4 <i>A.fumigatus</i> , 2<br><i>A.terreus</i> )                                                                                                | 6 (1 <i>A.flavus</i> , 4<br><i>A.fumigatus</i> , 1 <i>A.terreus</i> ) |
| ETA                 | 23/ 39                     | 5                                | 5 (2 <i>A.flavus</i> , 2 <i>A.fumigatus</i> , 1<br><i>A.niger</i> )                                                                                                  | 5 (2 <i>A.flavus</i> , 2<br><i>A.fumigatus</i> , 1 <i>A.niger</i> )   |
| Pleural<br>effusion | 5/ 5                       | 1                                | 1 (1 <i>A.fumigatus</i> ) (similar<br>isolation from patient's sputum<br>sample)                                                                                     |                                                                       |
| Total               | 235/ 731                   | 33                               | 34 (9 <i>A.flavus</i> , 10 <i>A.fumigatus</i> , 2<br><i>A.terreus</i> , 1 <i>A.niger</i> , 1<br><i>A.nidulans</i> ) (1 patient had same<br>isolate with two samples) | 18                                                                    |

[Note: BAL: bronchoalveolar lavage; ETA: endotracheal aspirate]

**Table S2.** Summary of few studies depicting hot-spot and other mutations in *cyp51A* gene of *A. fumigatus* imparting resistance to azole drugs.

| Total no. of <i>A. fumigatus</i> , source and drug resistant | Mutations in <i>cyp51A</i>                                    | No of isolates showing mutations | Breakpoints followed                   | Methodology and Endpoint                              | Country/ Region          | Reference                   |
|--------------------------------------------------------------|---------------------------------------------------------------|----------------------------------|----------------------------------------|-------------------------------------------------------|--------------------------|-----------------------------|
| 12(clinical):<br>ITRA                                        | Codon 54: G54E, G54V, G54R;<br>Codon 236: M236T, M236V, M236K | 6                                | ≤0.5µg/ml susceptible and >8 resistant | CLSI NCCLS<br>Endpoint: Complete inhibition of growth | Madrid, Spain/<br>Europe | Diaz-Guerra Tm et al., 2003 |

|                                                       |                                                                   |                      |                                                                                                                                        |                                                                                           |                                     |                              |
|-------------------------------------------------------|-------------------------------------------------------------------|----------------------|----------------------------------------------------------------------------------------------------------------------------------------|-------------------------------------------------------------------------------------------|-------------------------------------|------------------------------|
| 130(clinical):<br>ITRA                                | TR34, L98H;<br>S297T, F495I;<br><br>G54E/W, G138C,<br>M220R/I/V/K | 105;<br>12;<br><br>8 | itraconazole and voriconazole: <2 mg/l (susceptible), 2mg/l (intermediate), >2 mg/l (resistant); posaconazole <0.25, 0.5 and >0.5 mg/l | Agar screening: 4/8 mg/l itraconazole in SDA<br><br>CLSI M38-A                            | Nijmegen,<br>Netherlands/<br>Europe | Snelders E et al.,<br>2010   |
| 121 (clinical)<br>ITRA, VOR, and<br>POS               | TR34/L98H                                                         | 5                    | resistant: >2mg/l, itraconazole:<br>and voriconazole and >0.25mg/l,<br>posaconazole                                                    | EUCAST                                                                                    | Poland/ Europe                      | Nawrot U et al.,<br>2017     |
| 3(environmental):<br>Itraconazole<br>1: VOR<br>1: POS | TR34, L98H                                                        | 4                    | susceptible for itraconazole and<br>voriconazole≤1mg/l;<br>posaconazole≤0.25 mg/l                                                      | Agar screening: 4 mg/l<br>itraconazole in SDA<br>EUCAST<br>Endpoint: No visible<br>growth | Copenhagen,<br>Denmark/ Europe      | Mortensen KL et<br>al., 2010 |
| 1(clinical):Pan<br>azole                              | G432S                                                             | 1                    | resistance cut-offs for<br>itraconazole and voriconazole:<br>>2mg/l; posaconazole >0.25mg/l                                            | ETest                                                                                     | Paris, France/<br>Europe            | Alanio A et al.,<br>2011     |
| 14(clinical):<br>ITRA                                 | TR34, L98H                                                        | 14                   | Not applicable                                                                                                                         | CLSI M38-A                                                                                | Nijmegen,<br>Netherlands/<br>Europe | Mellado E et al.,<br>2007    |
| 17(clinical):<br>ITRA                                 | TR34/L98H<br>M220I<br>G54W<br>F219C                               | 6<br>1<br>1<br>1     | resistance cut-offs for<br>itraconazole and voriconazole:<br>>2mg/l; posaconazole >0.25mg/l                                            | EUCAST<br>Endpoint: No visible<br>growth                                                  | Germany/ Europe                     | Bader O et al.,<br>2013      |
| 1(clinical): ITRA<br>and VOR                          | TR46/Y121F/<br>T289A                                              | 1                    | Not applicable                                                                                                                         | EUCAST                                                                                    | France/ Europe                      | Lavergne R-A et<br>al., 2015 |
| 1(clinical): ITRA<br>and VOR                          | TR46/Y121F/<br>T289A                                              | 1                    | Not applicable                                                                                                                         | Sensititre YeastOne<br>YO10; CLSI M38-A2                                                  | Belgium/ Europe                     | Montesinos I et<br>al., 2014 |
| 4(clinical): Pan<br>azole                             | TR46/Y121F/T298A<br>; M172I, G448S<br>M220R<br>TR34/L98H          | 1<br><br>1<br>1      | resistance cut-offs for<br>itraconazole and voriconazole:<br>>2mg/l; posaconazole >0.25mg/l                                            | EUCAST                                                                                    | Nijmegen,<br>Netherlands/<br>Europe | van Ingen J et al.,<br>2015  |

|                                         |                                                                                                  |                                 |                                                                                                                                                                                              |                                                                                        |                                       |                               |
|-----------------------------------------|--------------------------------------------------------------------------------------------------|---------------------------------|----------------------------------------------------------------------------------------------------------------------------------------------------------------------------------------------|----------------------------------------------------------------------------------------|---------------------------------------|-------------------------------|
| 21(clinical):<br>ITRA and VOR           | TR46/Y121F/<br>T289A<br>TR34/L98H<br>M172I/G448S<br>S297T/F495I                                  | 3<br>15<br>1<br>2               | voriconazole: resistant: >2mg/l,<br>susceptible: ≤1 mg/l.<br>itraconazole: resistant: >2mg/l,<br>susceptible: ≤1 mg/l.<br>posaconazole: resistant:<br>>0.25mg/l, susceptible: ≤0.12<br>mg/l. | EUCAST                                                                                 | Nijmegen,<br>Netherlands/<br>Europe   | Fuhren J et al.,<br>2015      |
| 0<br>(clinical/hospital<br>environment) | N479D;F165L;N248<br>K;D262Y;M172V;F<br>46Y;E427K;D255E;<br>N248T; Other silent<br>mutations      | 9                               | resistant: ≥4 mg/l susceptible:<1<br>mg/l                                                                                                                                                    | CLSI M38-A2                                                                            | Madrid, Spain/<br>Europe              | Escribano P et al.,<br>2011   |
| 220 (clinical)<br>ITRA, VOR, and<br>POS | M220V,TR46/Y121<br>F/T289A, G54R,<br>G138S, TR34/L98H,<br>G448S, F219S,<br>M220I, G54E,<br>G138C | 26                              | resistant: voriconazole and<br>itraconazole ≥4 mg/l;<br>posaconazole ≥0.5 mg/l                                                                                                               | CLSI M38-A2                                                                            | USA/ North<br>America                 | Wiederhold NP et<br>al., 2016 |
| 0                                       | N248K;<br>I242V;<br>A9T;<br>A9T                                                                  | 5                               | resistance cut-offs for<br>itraconazole and voriconazole:<br>>2mg/l                                                                                                                          | Sensititre YeastOne<br>YO10; CLSI M38-A2<br>Endpoint: Complete<br>inhibition of growth | Toronto, Canada/<br>North America     | Shalhoub S et al.,<br>2015    |
| 38<br>(environmental)                   | TR46/Y121F/T289A<br>, TR53, TR34/L98H                                                            | 17                              | Not applicable                                                                                                                                                                               | CLSI M38-A2                                                                            | Bogotá,<br>Colombia/ Latin<br>America | Le Pape P et al.,<br>2016     |
| 1 (clinical) ITRA                       | G54E                                                                                             | 1 (fungal<br>keratitis<br>case) | Not applicable                                                                                                                                                                               | CLSI M38-A2                                                                            | Argentina/ South<br>America           | Leonardelli F et<br>al., 2017 |
| 4(clinical): ITRA                       | M220I;<br>G54R                                                                                   | 1;<br>3                         | Not applicable                                                                                                                                                                               | E-Test<br>CLSI M38-A<br>Endpoint: No visible<br>growth                                 | Beijing, China/<br>Asia               | Chen J et al., 2005           |
| 38 (clinical)<br>ITRA, VOR, and<br>POS  | TR34/L98H                                                                                        | 3                               | resistant: >1, >1 or >0.5 mg/l to<br>itraconazole, voriconazole and<br>posaconazole, respectively                                                                                            | Sensititre YeastOne,<br>CLSI M38-A2                                                    | Taiwan/ Asia                          | Wu CJ et al., 2015            |

|                                                         |                                                                       |                                      |                                                                                                                                                                                  |                     |                     |                            |
|---------------------------------------------------------|-----------------------------------------------------------------------|--------------------------------------|----------------------------------------------------------------------------------------------------------------------------------------------------------------------------------|---------------------|---------------------|----------------------------|
| 50 (environmental), 16 (clinical)<br>ITRA, VOR, and POS | TR34/L98H                                                             | 1 (environmental), 2 (clinical)      | resistant: $\geq 2$ , $\geq 0.5$ and $\geq 2$ mg/l to itraconazole, posaconazole and voriconazole, respectively                                                                  | E-test, CLSI M38-A2 | Kuwait/ Middle East | Ahmad S et al., 2015       |
| 746 (clinical)<br>ITRA, VOR, and POS                    | TR34/L98H                                                             | 66 mutations detected; 10 undetected | Not applicable                                                                                                                                                                   | CLSI M38-A          | Turkey/ Middle East | Özmerdiven GE et al., 2015 |
| 418 (clinical)<br>ITRA, VOR, and POS                    | TR34/L98H, G54R, F46Y, Y431S and G448S                                | 6 mutations detected; 3 undetected   | resistant: $>2$ mg/l, itraconazole: and voriconazole and $>0.25$ mg/l, posaconazole                                                                                              | CLSI M38-A2         | Australia/ Oceania  | Kidd SE et al., 2015       |
| 685 (clinical)<br>ITRA, VOR, ISA and POS                | (10) TR34/L98H, (1) G54E and one isolate with non-synonymous mutation | 12                                   | itraconazole, 1 $\mu$ g/ml; voriconazole, 1 $\mu$ g/ml; posaconazole, 0.5 $\mu$ g/ml; isavuconazole, 1 $\mu$ g/ml; amphotericin B, 4 $\mu$ g/ml and caspofungin, 0.25 $\mu$ g/ml | CLSI M38-A2         | Delhi, India/ Asia  | Chowdhary A et al., 2015   |

[NOTE: ITR: itraconazole; VOR: voriconazole; POS; posaconazole; ISA: isavuconazole; CLSI: Clinical and Laboratory Standards Institute; EUCAST: European Committee on Antimicrobial Susceptibility Testing]
